# Supplementary material for: Community Air Sensor Network (CAIRSENSE) project: Evaluation of low-cost sensor performance in a suburban environment in the southeastern United States
Source: Copernicus journal article supplement (doi:10.5194/amt-2016-131), 2016-06-21
Supplement: Supplementary file 1 [file amt-2016-131-supplement.pdf]

## **Appendix**

**Table A-1.** Multiple Regression Models for Selected Sensors with Environmental Artifact Corrections

| Averaging Time | Pollutant       | Sensor             | Artifact Variable | R <sup>2</sup> <sub>adj</sub> | Equation                                                    |
|----------------|-----------------|--------------------|-------------------|-------------------------------|-------------------------------------------------------------|
| 12-hr          | PM              | Shinyei SAFT-2     | RH, Day           | 0.42                          | $C_{FEM} = 11.3 + 0.787C - 0.0400RH - 0.0112Day$            |
|                |                 | Dylos SAFT-2 Small | RH, Day           | 0.60                          | $C_{FEM} = 14.8 + 0.00164C_{Sensor} - 0.0751RH - 0.0358Day$ |
|                |                 | Airbeam SAFT-2     | RH, Day           | 0.51                          | $C_{FEM} = 12.2 + 0.00203C_{Sensor} - 0.0693RH - 0.0167Day$ |
| Hourly         | O <sub>3</sub>  | Aeroqual SAFT-1    | NA                |                               |                                                             |
|                |                 | CairClip SAFT-1    | RH                | 0.95                          | $C_{FEM} = 26.6 + 0.709C_{Sensor} - 0.175RH$                |
|                | NO <sub>2</sub> | CairClip SAFT-1    | T, RH             | 0.81                          | $C_{FEM} = 26.2 + 1.18C_{Sensor} - 0.483T - 0.129RH$        |
|                | NO              | AQMesh SAFT-1      | NA                |                               |                                                             |
|                | CO              | AQMesh SAFT-1      | Day               | 0.75                          | $C_{FEM} = -7.09E-02 + 8.88E-04C_{Sensor} + 2.52E-03Day$    |

**Table A-2.** Linear Regression Equations Used to Correct Wireless Sensor Network (WSN) Hourly Sensor Data

| Pollutant      | Sensor      | r <sup>2</sup> | Equation                         |
|----------------|-------------|----------------|----------------------------------|
| PM             | N1 Shinyei  | 0.20           | $C_{FEM} = 0.5C_{Sensor} + 7.3$  |
|                | N2 Shinyei  | 0.21           | $C_{FEM} = 0.66C_{Sensor} + 7.3$ |
|                | N3 Shinyei  | 0.17           | $C_{FEM} = 0.96C_{Sensor} + 6.4$ |
|                | N4 Shinyei  | 0.18           | $C_{FEM} = 0.53C_{Sensor} + 6.4$ |
| O <sub>3</sub> | N1 Aeroqual | 0.39           | $C_{FEM} = 630C_{Sensor} + 8.9$  |
|                | N4 Aeroqual | 0.76           | $C_{FEM} = 815C_{Sensor} + 5.6$  |

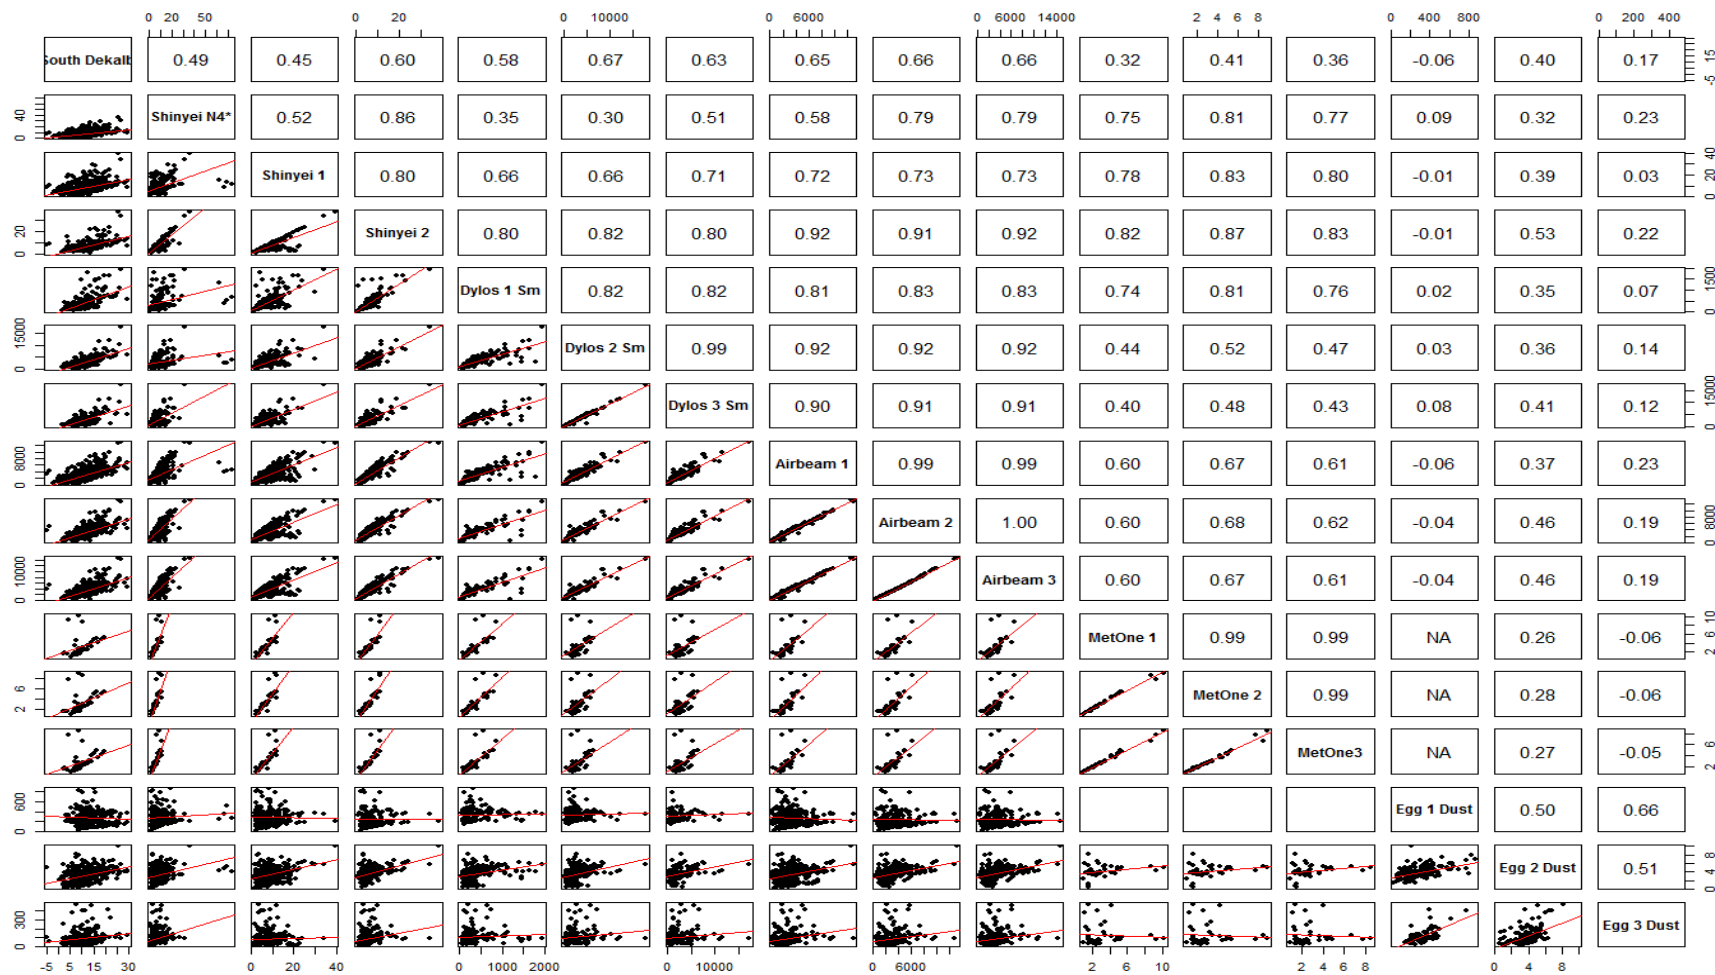

**Figure A-1.** Scatterplot and correlation matrix of 12-hr average PM readings between sensors and co-located FEM instrument. Raw sensor units are shown in the comparison. Linear regressions are superimposed on pairwise plots. (\*: data with aluminum foil added)

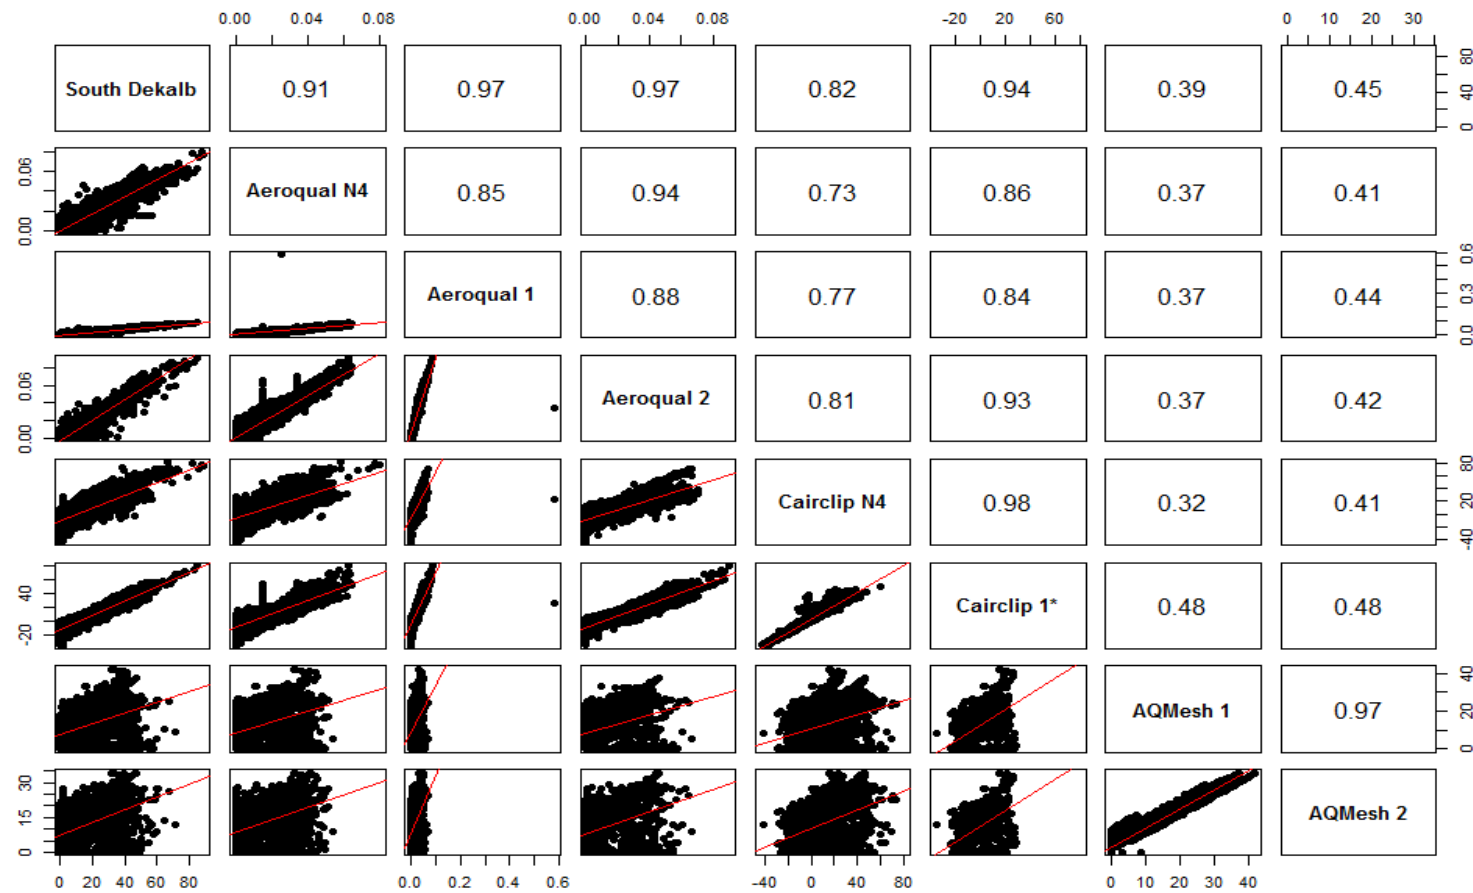

**Figure A-2.** Scatterplot and correlation matrix of hourly average ozone readings between sensors and co-located FEM instrument. Raw sensor units are shown in the comparison. Linear regressions are superimposed on pairwise plots. (\*: data after sensor replacement on 2014/11/15).

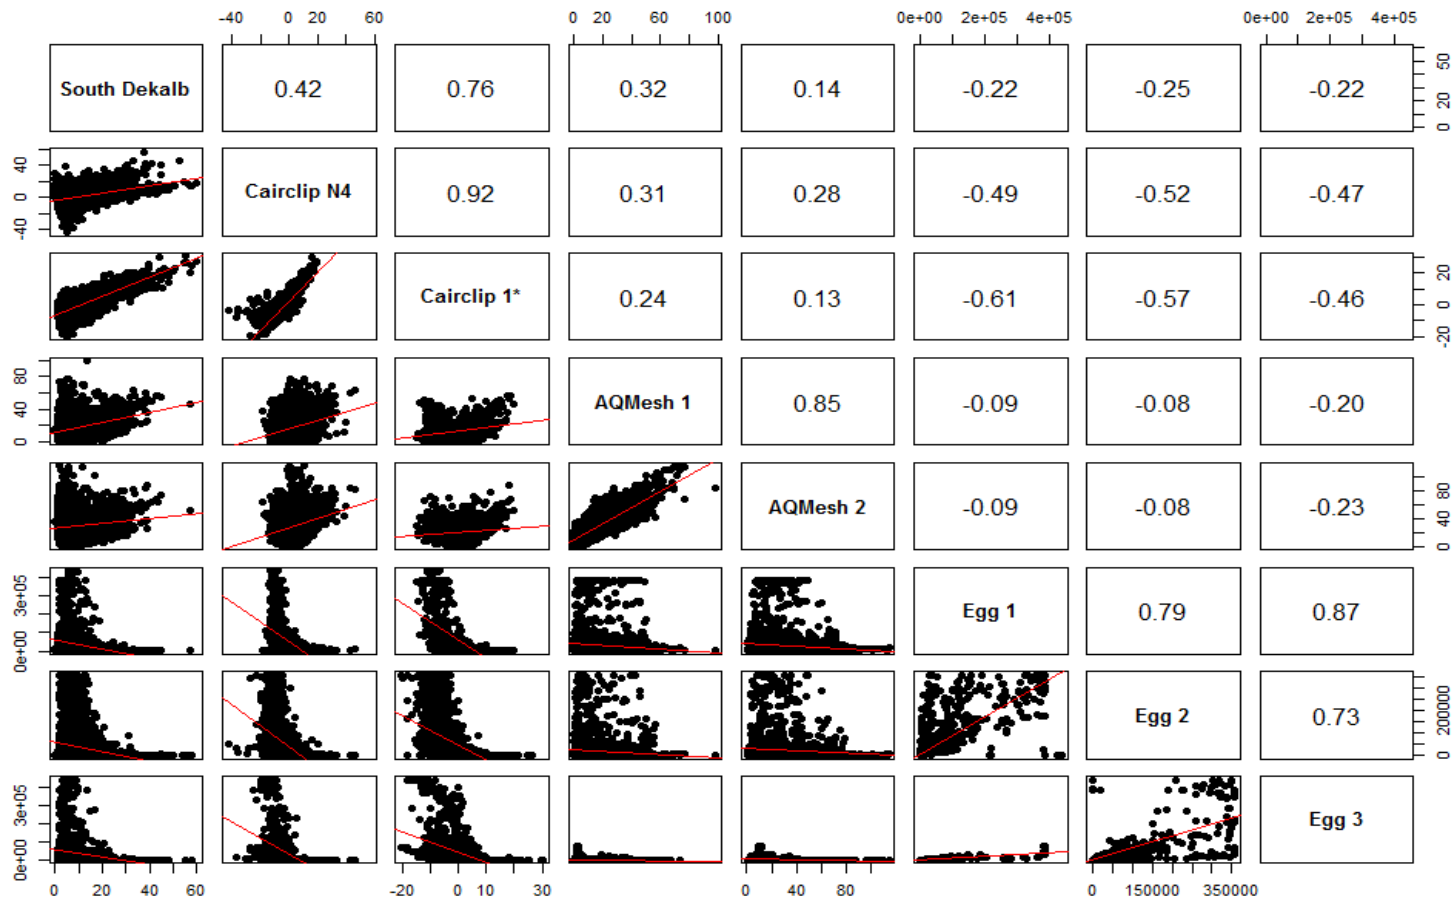

**Figure A-3.** Scatterplot and correlation matrix of hourly average NO<sub>2</sub> readings between sensors and co-located FEM instrument. Raw sensor units are shown in the comparison. Linear regressions are superimposed on pairwise plots. (\*: data after sensor replacement on 2014/11/15).

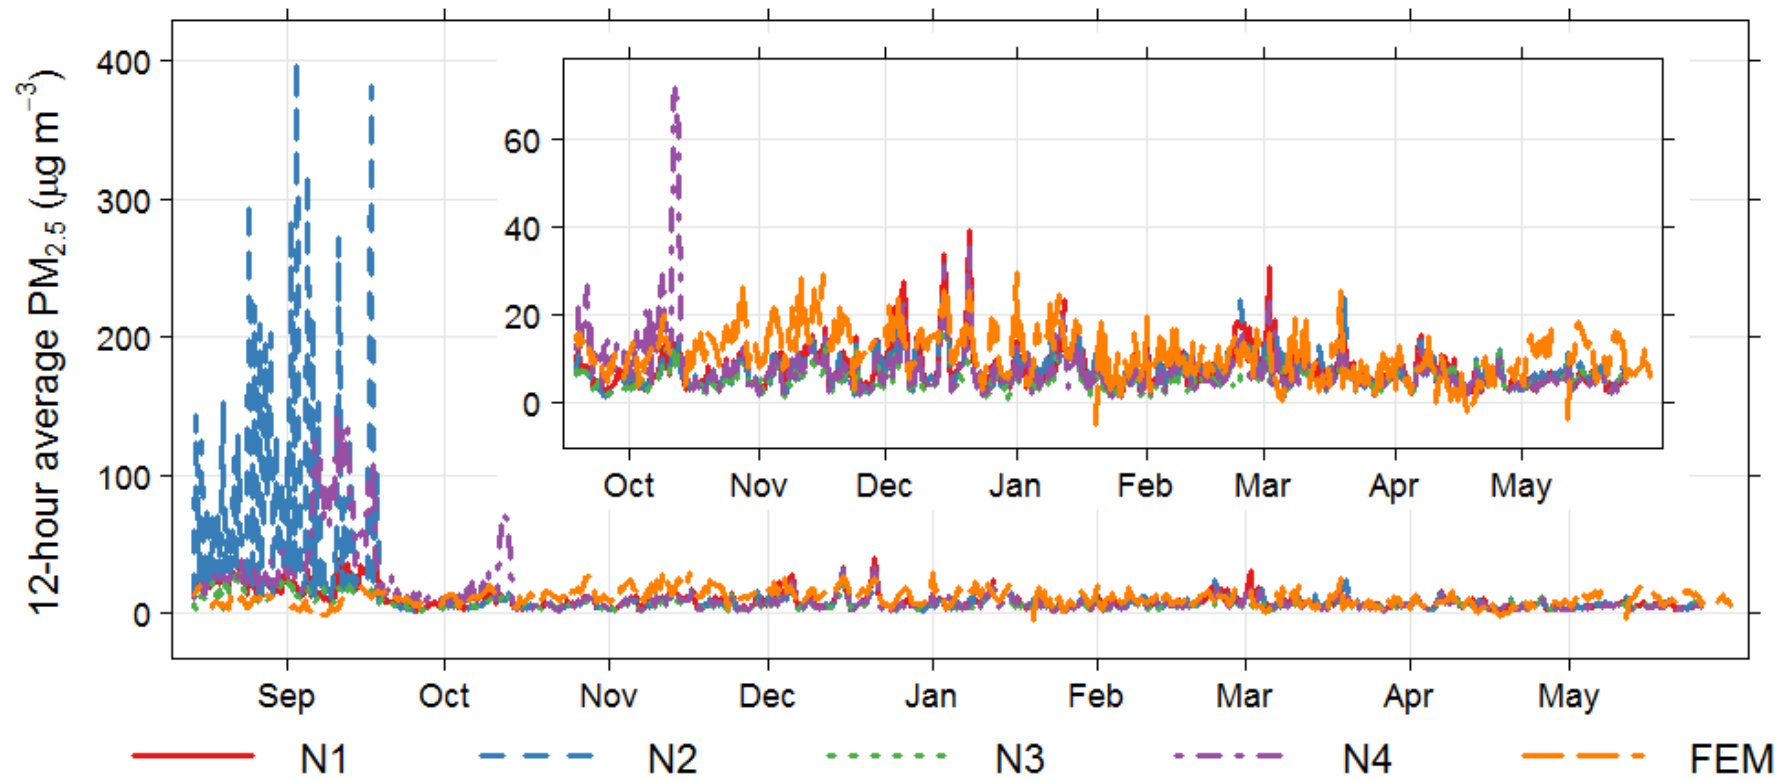

**Figure A-4.** Effect of adding aluminum foils on 2014/09/18 to avoid spurious readings in Shinyei sensors for Wireless Sensor Network nodes.

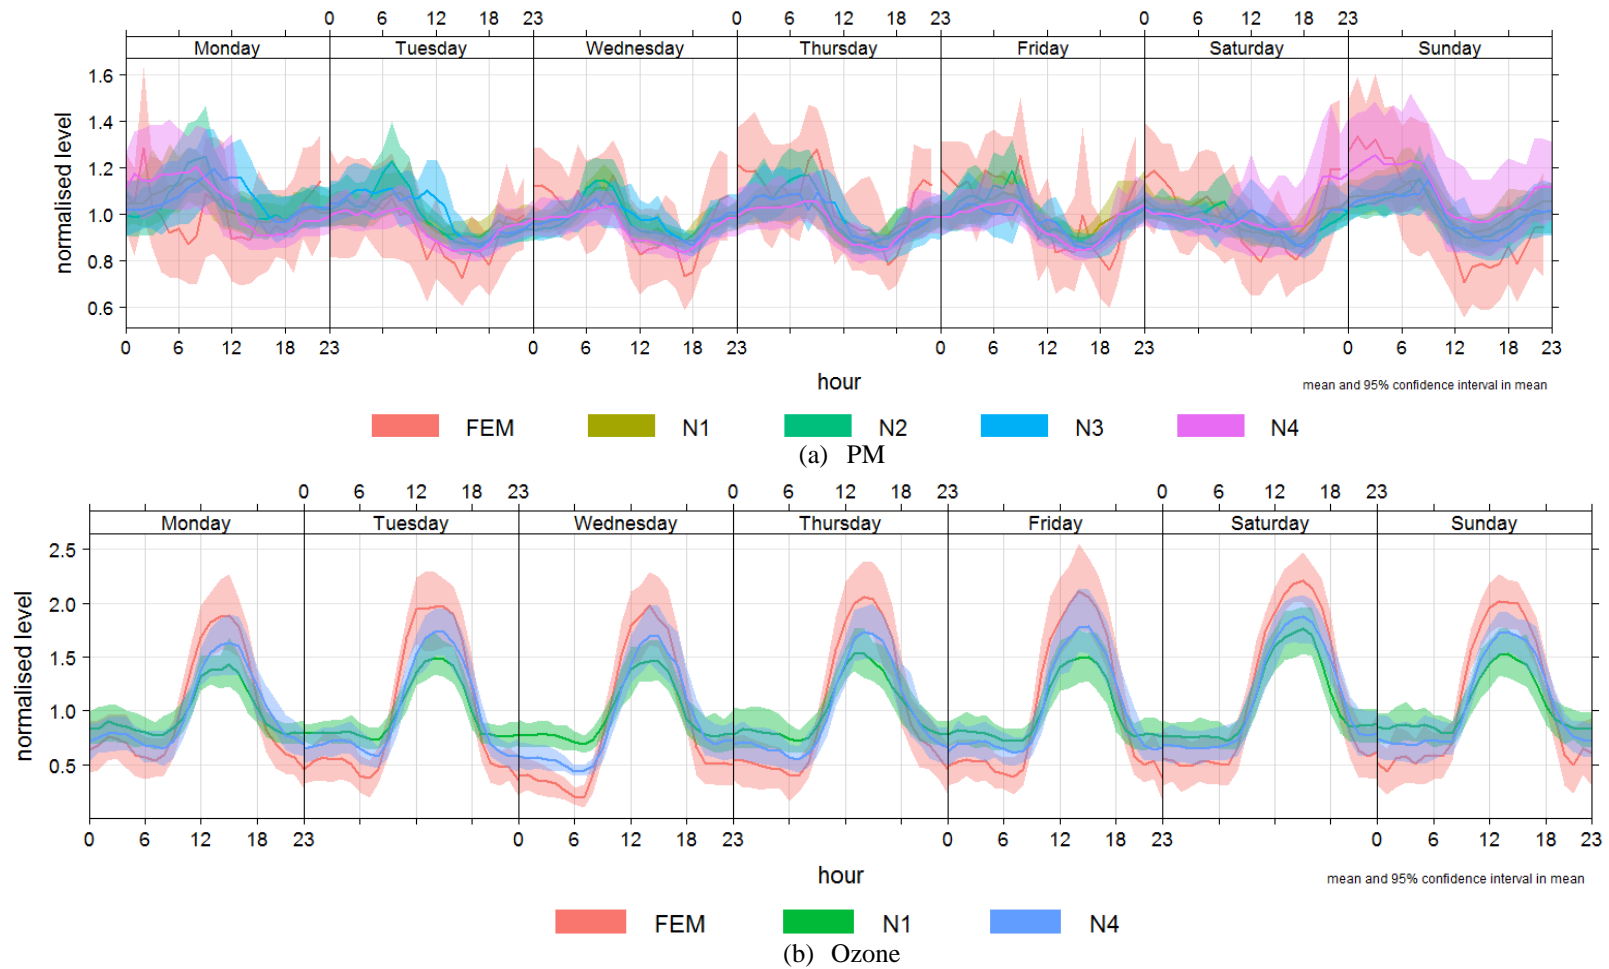

**Figure A-5.** Time variation in Wireless Sensor Network with FEM-corrected hourly PM (with aluminum foil) and Ozone sensor measurements.

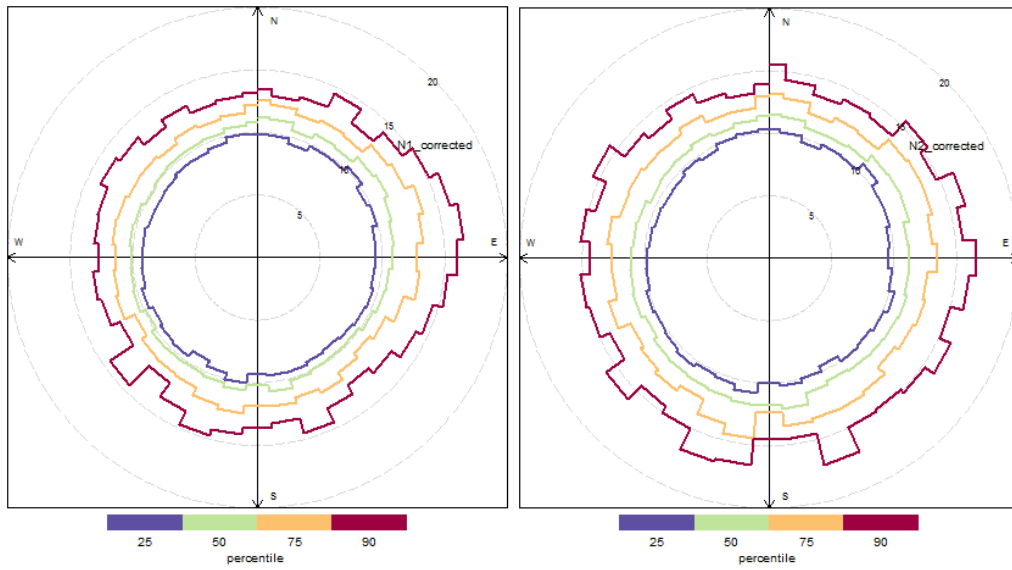

(a) Near-road Node 1 Shinyei PM      (b) Node 2 Shinyei PM

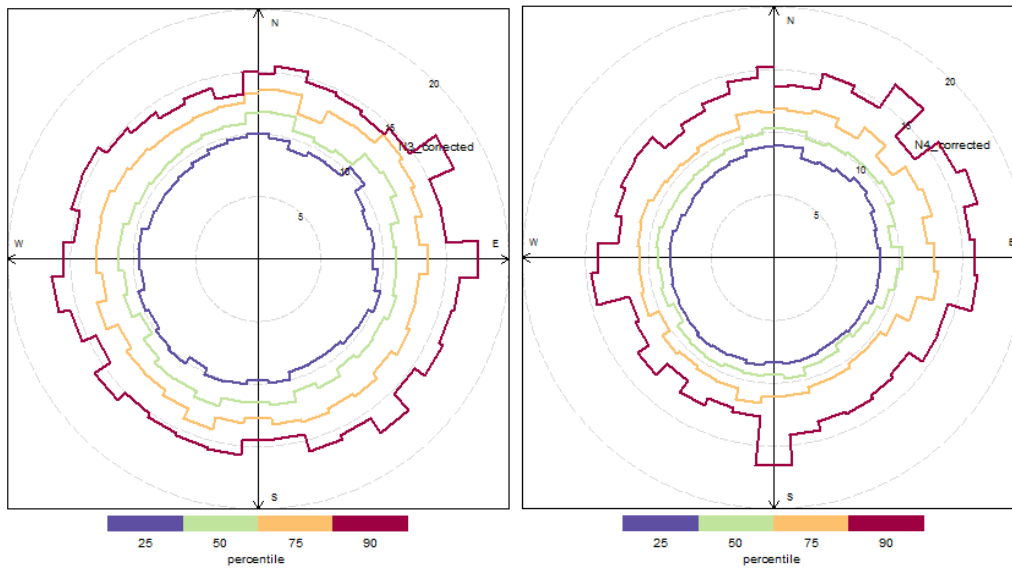

(c) Node 3 Shinyei PM      (d) NCore co-located Node 4 Shinyei PM

**Figure A-6.** Example percentile rose plots of wireless sensor network (WSN) Shinyei sensors for hourly FEM-corrected PM between mid-September 2014 and May 2015.
